# Supplementary material for: Fine metagenomic profile of the Mediterranean stratified and mixed water columns revealed by assembly and recruitment
Source: Microbiome. 2018 Jul 10;6:128. doi: 10.1186/s40168-018-0513-5 (PMC6040077; doi:10.1186/s40168-018-0513-5)
Supplement: Supplementary file 2 — Table S1. Relative abundance of 16S rRNA reads. (XLSX 25 kb) [file 40168_2018_513_MOESM2_ESM.xlsx]

## Sheet: Table_S1
Table S1. Relative abundance of 16S rRNA reads.
Domain	Phylum	Class	Family	MedWinter-JAN2015-20m	MedWinter-JAN2015-80m	Med-OCT2015-15m	Med-OCT2015-30m	Med-OCT2015-45m	Med-OCT2015-60m	Med-OCT2015-75m	Med-OCT2015-90m
Archaea				7.3	5.04	0.0343053	0.787933	6.67254	11.1243	13.5894	15.7789
	Euryarchaeota			4.44676	2.72178	0.0171527	0.720396	5.04294	5.59178	4.97173	5.80697
		Thermoplasmata		1.84887	1.04369	0	0.247636	1.56353	2.35131	1.98869	2.68322
			Methanomassiliicoccaceae	0.360292	0.122787	0	0.0675371	0.0220216	0.158072	0.155976	0.20024
			unclassified_Thermoplasmata	1.48857	0.920905	0	0.180099	1.54151	2.19324	1.83272	2.46296
		Halobacteria		0.0284441	0	0	0	0	0.0197589	0.0779879	0.020024
			Halobacteriaceae	0.0284441	0	0	0	0	0.0197589	0.0779879	0.020024
		unclassified_"Euryarchaeota"		2.46516	1.65763	0	0.47276	3.45739	3.22071	2.90505	3.10372
	Thaumarchaeota			2.83493	2.32273	0	0.0450248	1.34332	5.51274	8.57867	9.95194
			Nitrosopumilaceae	2.81597	2.32273	0	0.0450248	1.34332	5.51274	8.55917	9.85182
	unclassified_Archaea			0	0	0.0171527	0.0225124	0.286281	0	0	0.020024
Bacteria				92.7	94.96	99.9657	99.2121	93.3275	88.8757	86.4106	84.2211
	Acidobacteria			0.075851	0.0409291	0	0	0	0.118554	0.214467	0.600721
		Acidobacteria_Gp6		0.00948137	0	0	0	0	0.0790358	0.0779879	0.380457
		Acidobacteria_Gp21		0	0	0	0	0	0	0.038994	0.10012
		unclassified_"Acidobacteria"		0	0	0	0	0	0.0395179	0.0584909	0.10012
	Actinobacteria			2.37982	3.41758	1.06346	1.19316	1.40938	2.37107	3.2365	2.72327
		Actinobacteria		2.37982	3.41758	1.06346	1.19316	1.40938	2.37107	3.2365	2.72327
			Acidimicrobineae_incertae_sedis	0	0	0	0	0	0.0790358	0.0974849	0
			Iamiaceae	0.616289	0.521846	0	0.0225124	0.132129	0.296384	0.272958	0.320384
			Microbacteriaceae	0.0663696	0.869743	0.0686106	0.0225124	0.0220216	0.0197589	0	0
			Mycobacteriaceae	0.132739	0.13302	0.0857633	0.112562	0.176173	0.237107	0.38994	0.30036
			unclassified_"Acidimicrobineae"	0.123258	0.184181	0.0171527	0	0.594583	1.16578	1.83272	1.78214
			unclassified_Actinobacteria	1.10932	1.35066	0.720412	0.855471	0.330324	0.276625	0.311952	0.0800961
	Bacteroidetes			8.33412	7.02957	6.94683	5.89824	8.89672	5.01877	3.54845	2.64317
		Bacteroidia		0.246516	0.194413	0.25729	0.0900495	0.198194	0.0592768	0.0584909	0.020024
			Bacteroidaceae	0.123258	0.0511614	0.137221	0.0450248	0.176173	0.0395179	0.019497	0
		Cytophagia		0.493031	0.399059	0.0343053	0.450248	0.990971	0.731081	0.409437	0.340408
			Flammeovirgaceae	0.0284441	0.0613936	0.0171527	0.38271	0.660647	0.395179	0.19497	0.180216
			unclassified_Cytophagales	0.464587	0.3172	0	0.0675371	0.308302	0.276625	0.214467	0.160192
		Flavobacteriia		7.16792	5.90402	5.67753	4.34489	7.2451	3.79372	2.96354	2.06247
			Cryomorphaceae	1.66872	1.11532	0.377358	0.56281	0.924906	0.829876	0.623903	0.340408
			Flavobacteriaceae	4.61743	4.13384	4.99142	3.42188	5.8137	2.52914	2.16416	1.5819
			unclassified_"Flavobacteriales"	0.881767	0.654865	0.308748	0.360198	0.506496	0.434697	0.175473	0.140168
		Sphingobacteriia		0.0853323	0.0716259	0.463122	0.450248	0.132129	0.138313	0.019497	0
			Chitinophagaceae	0.0189627	0	0.428816	0.405223	0.0880863	0.0197589	0	0
			Saprospiraceae	0.0568882	0.0204645	0	0.0450248	0.0220216	0.0987947	0.019497	0
		unclassified_"Bacteroidetes"		0.341329	0.45022	0.51458	0.540297	0.330324	0.296384	0.0974849	0.220264
	candidate division ZB3			0	0	0.0686106	0.157587	0.0660647	0.0197589	0.0584909	0.0400481
	Chloroflexi			0.398218	0.276271	0.0171527	0.0675371	0.132129	0.770599	1.11133	2.14257
		unclassified_"Chloroflexi"		0.379255	0.266039	0	0	0.110108	0.652045	1.03334	1.96235
	Cyanobacteria			6.54214	5.07521	5.8319	9.79289	4.88879	5.35467	7.91577	3.24389
		Cyanobacteria		6.54214	5.07521	5.8319	9.79289	4.88879	5.35467	7.91577	3.24389
			Family I	0.218071	0.13302	0	0.0450248	0.0220216	0.0197589	0.0584909	0.020024
			Family II	6.18185	4.90126	5.74614	9.61279	4.66858	5.25588	7.79879	3.10372
			Family IX	0.142221	0.0306968	0.0343053	0.0450248	0.110108	0.0197589	0	0.0400481
	Deinococcus-Thermus			0.132739	0.153484	0.051458	0.0225124	0.0220216	0	0.0779879	0.020024
		Deinococci		0.132739	0.153484	0.051458	0.0225124	0.0220216	0	0.0779879	0.020024
			Deinococcaceae	0.123258	0.153484	0.051458	0.0225124	0.0220216	0	0.038994	0.020024
	Firmicutes			0.27496	0.532078	0.120069	0.247636	0.638626	0.573009	0.487424	0.881057
		Bacilli		0.0853323	0.286504	0.0343053	0.0450248	0.198194	0.138313	0.116982	0.20024
			Alicyclobacillaceae	0	0.13302	0.0171527	0	0.0220216	0	0.019497	0.0800961
		Clostridia		0	0.184181	0.0686106	0.135074	0.330324	0.355661	0.311952	0.480577
			Clostridiaceae 1	0	0.0409291	0.0171527	0.0450248	0	0.0987947	0.0584909	0.120144
			Peptococcaceae 1	0	0.0102323	0	0	0.0440432	0.0592768	0.116982	0.0800961
		Negativicutes		0	0.0306968	0	0.0225124	0.0880863	0.0790358	0.038994	0.160192
			Veillonellaceae	0	0	0	0.0225124	0.0880863	0.0790358	0.038994	0.160192
	Marinimicrobia			2.48412	2.32273	1.16638	3.10671	5.41731	4.58407	5.1667	6.26752
	Nitrospinae			0.161183	0.143252	0	0.0225124	0.0440432	0.37542	1.09183	0.921105
		Nitrospinia		0.161183	0.143252	0	0.0225124	0.0440432	0.37542	1.09183	0.921105
			Nitrospinaceae	0	0.143252	0	0.0225124	0.0440432	0.37542	1.09183	0.921105
	Planctomycetes			1.13776	0.961834	0.343053	0.225124	0.154151	0.770599	1.15032	1.02123
		Phycisphaerae		0.113776	0.102323	0.137221	0.112562	0.0440432	0.256866	0.350946	0.340408
			Phycisphaeraceae	0.113776	0.102323	0.137221	0.112562	0.0440432	0.256866	0.350946	0.340408
		Planctomycetia		0	0.839046	0.171527	0.112562	0.110108	0.513732	0.799376	0.640769
			Planctomycetaceae	0	0.76742	0.171527	0.112562	0.0880863	0.493974	0.6434	0.480577
			unclassified_Planctomycetia	0	0.07	0	0	0	0	0.155976	0.160192
	Proteobacteria			64.862	70.4697	80.8233	73.9307	66.9016	61.4305	55.3909	56.0072
		Alphaproteobacteria		41.6232	44.2853	57.8216	52.0486	45.5406	42.2644	34.8216	34.0609
			Acetobacteraceae	0.075851	0.0716259	0.0171527	0	0.0220216	0	0.0584909	0.0400481
			Bartonellaceae	0.151702	0.143252	0.0343053	0	0.0220216	0.0592768	0.019497	0.020024
			Bradyrhizobiaceae	0.075851	0.143252	0.120069	0.0900495	0.0660647	0.118554	0.155976	0.10012
			Caulobacteraceae	0.227553	0.634401	0.137221	0.135074	0.0220216	0	0.038994	0
			Erythrobacteraceae	0.0568882	0.22511	0.0343053	0.0450248	0.0220216	0.0395179	0.116982	0.0400481
			Hyphomonadaceae	0.123258	0.573007	0	0	0	0	0	0
			Hyphomicrobiaceae	0.0568882	0.0511614	0.0343053	0	0.0220216	0.0592768	0.0584909	0.0400481
			Magnetococcaceae	0.075851	0.0204645	0.171527	0.135074	0.220216	0.0790358	0.0584909	0.0600721
			Methylocystaceae	0.0189627	0.0102323	0.0343053	0.0225124	0	0.0197589	0	0
			Parvularculaceae	0.00948137	0.0511614	0	0	0	0.158072	0.0974849	0
			Phyllobacteriaceae	0.0948137	0.13302	0.0343053	0.0450248	0.0220216	0	0.019497	0
			Rhodobacteraceae	2.76856	2.05669	2.91595	2.58892	4.29421	1.60047	0.701891	0.420505
			Rhodospirillaceae	2.10486	1.50414	2.83019	2.20621	1.23321	1.83758	1.07233	1.02123
			SAR11	24.8033	27.6169	39.2967	37.8658	32.68	30.0138	26.1844	26.1714
			Sphingomonadaceae	0.379255	1.81111	0.737564	0.157587	0.132129	0.17783	0.545915	0.260312
			unclassified_Alphaproteobacteria	9.87959	8.39046	10.7204	8.10446	5.10901	6.85635	5.08871	5.26632
			unclassified_Rhizobiales	0.237034	0.194413	0.325901	0.225124	1.40938	0.908911	0.350946	0.240288
			unclassified_Rhodospirillales	0.227553	0.0613936	0.154374	0.247636	0.132129	0.197589	0.0974849	0.240288
		Betaproteobacteria		0.663696	0.879975	0.394511	0.292661	0.440432	0.395179	0.350946	0.160192
			Burkholderiaceae	0.0474068	0.214878	0	0	0.0220216	0.0395179	0.038994	0
			Methylophilaceae	0.132739	0.163716	0	0.0450248	0.242237	0.158072	0.19497	0.10012
			Rhodocyclaceae	0.0379255	0.0716259	0	0	0.0220216	0	0	0.020024
			unclassified_Betaproteobacteria	0.142221	0.0920905	0.0171527	0.0450248	0.0660647	0.0790358	0.019497	0.020024
			unclassified_Burkholderiales	0.0284441	0.0204645	0.360206	0.157587	0.0220216	0.0987947	0.019497	0
		Deltaproteobacteria		1.15673	1.01299	0.634648	0.697884	0.814799	1.60047	2.12517	2.5831
			Bacteriovoracaceae	0.0284441	0.0511614	0.051458	0.0450248	0	0.217348	0.116982	0.160192
			Desulfuromonadaceae	0.0568882	0.0204645	0.0171527	0.0450248	0	0	0.0779879	0.0400481
			unclassified_Deltaproteobacteria	0.616289	0.521846	0.394511	0.495272	0.770755	1.22505	1.75473	1.96235
		Gammaproteobacteria		20.366	23.4831	21.3379	20.081	18.0357	13.3966	12.634	13.5563
			Alcanivoracaceae	0	0	0	0	0.0220216	0.0197589	0	0
			Alteromonadaceae	0.0379255	0.521846	0.102916	0.180099	0.176173	0.335902	0.214467	0.160192
			Alteromonadales_incertae_sedis	0.218071	0.685562	0.051458	0.0225124	0.0440432	0	0.019497	0
			Coxiellaceae	0.0568882	0.0818582	0.274443	0.0675371	0.0220216	0.0987947	0.136479	0.0800961
			Ectothiorhodospiraceae	0.142221	0.0920905	0.0171527	0	0.0220216	0.138313	0.136479	0.220264
			Enterobacteriaceae	0.227553	0.184181	0.205832	0.112562	0.132129	0.0592768	0.0779879	0.160192
			Halomonadaceae	0.0948137	0.173949	0.0686106	0	0.0440432	0.118554	0.038994	0.0400481
			Legionellaceae	0.284441	0.306968	0.0343053	0.0225124	0.0440432	0.0395179	0.0779879	0.0600721
			Oceanospirillaceae	0.0568882	0.0716259	0.120069	0.0675371	0.132129	0.0197589	0.019497	0.0400481
			Pseudoalteromonadaceae	0.20859	0.0920905	0.0686106	0.0675371	0.0660647	0.0592768	0.0584909	0.0400481
			Pseudomonadaceae	0.69214	6.48726	0.566038	0.270149	0.330324	0.395179	0.370443	0.30036
			Shewanellaceae	0.151702	0.143252	0.0343053	0.0675371	0	0	0.019497	0
			Thiotrichales_incertae_sedis	0	0	0	0	0.0440432	0.0197589	0	0
			Vibrionaceae	0.113776	0.102323	0.171527	0.202611	0.0660647	0.0592768	0	0.120144
			Xanthomonadaceae	0.0284441	0.0716259	0	0.0225124	0.0220216	0	0.019497	0.020024
			unclassified_Chromatiales	0.407699	0.235342	0.0171527	0.135074	0.0220216	0.0197589	0.0584909	0.0800961
			unclassified_Gammaproteobacteria	16.3743	13.0359	18.9708	17.7848	15.4371	10.8477	10.3724	11.0533
			unclassified_Gammaproteobacteria_incertae_sedis	0.161183	0.173949	0.0343053	0.0225124	0.198194	0.434697	0.487424	0.740889
			unclassified_Oceanospirillales	0.0284441	0.122787	0	0.0225124	0.0220216	0.0790358	0	0.0400481
		unclassified_"Proteobacteria"		1.04295	0.798117	0.634648	0.765421	2.02599	3.7542	5.42016	5.62675
	Spirochaetes			0.180146	0.163716	0.0857633	0.225124	0.132129	0.0395179	0.019497	0
		Spirochaetia		0.180146	0.163716	0.0857633	0.225124	0.132129	0.0395179	0.019497	0
			Spirochaetaceae	0.170665	0.163716	0.051458	0.180099	0.110108	0.0395179	0.019497	0
	Verrucomicrobia			2.09538	1.57577	1.85249	2.1837	0.616604	2.03517	1.34529	1.56187
		Opitutae		0.777472	0.67533	1.71527	1.68843	0.352345	0.493974	0.214467	0.240288
			Puniceicoccaceae	0.730065	0.644633	1.69811	1.68843	0.352345	0.493974	0.214467	0.240288
		Subdivision3		0.350811	0.337665	0.0343053	0.112562	0.0880863	0.237107	0.038994	0.020024
		Verrucomicrobiae		0.644733	0.419523	0.0686106	0.202611	0.0440432	0.612527	0.604406	0.700841
			Verrucomicrobiaceae	0.62577	0.419523	0.0686106	0.202611	0.0440432	0.612527	0.584909	0.640769
		unclassified_"Verrucomicrobia"		0.312885	0.143252	0.0343053	0.180099	0.132129	0.652045	0.467927	0.580697
	unclassified_Bacteria			3.47018	2.70132	1.52659	1.93606	2.88483	5.15708	5.10821	5.7469
