# Supplementary material for: Fine metagenomic profile of the Mediterranean stratified and mixed water columns revealed by assembly and recruitment
Source: Microbiome. 2018 Jul 10;6:128. doi: 10.1186/s40168-018-0513-5 (PMC6040077; doi:10.1186/s40168-018-0513-5)
Supplement: Supplementary file 4 — Table S3. Relative abundance of functional gene categories related to motility and chemotaxis at subsystem level 3 (SEED database). The highest value for each one has been highlighted in red. (XLSX 13 kb) [file 40168_2018_513_MOESM4_ESM.xlsx]

## Sheet: Hoja1
		Table S3. Relative abundance of functional gene categories related to Motility and Chemotaxis at subsystem level 3 (SEED database). The highest value for each one has been highlighted in red
		Flagellar biosynthesis protein	Med-Oct-2015-15m	Med-OCT2015-30m	Med-OCT2015-45m	Med-OCT2015-60m	Med-OCT2015-75m	Med-OCT2015-90m	MedWinter-JAN2015-20m	MedWinter-JAN2015-80m
		Flagellar motor rotation protein MotB	0.0531816	0.0357091	0.0054484	0.0243577	0.0119566	0.0105501	0.0227594	0.0233138
		Flagellar regulatory protein FleQ	0.0440647	0.0150354	0.0054484	0.0121788	0.00619971	0.00803814	0.00487702	0.0107602
		Flagellin protein FlaA	0.0398862	0.0256855	0.0217936	0.0201216	0.0185991	0.0135644	0.00325135	0.00179337
		Flagellar hook protein FlgE	0.0326687	0.0200472	0	0.00900176	0.00354269	0.00251192	0	0.00717347
		Flagellar biosynthesis protein FlhA	0.0292499	0.0256855	0.0108968	0.0148264	0.00841389	0.00602861	0.00487702	0.00896684
		Flagellar basal-body rod protein FlgG	0.0277304	0.0150354	0.0054484	0.0105903	0.00531404	0.00401907	0.00162567	0.0107602
		Flagellar biosynthesis protein FlhB	0.0269707	0.0275649	0.0054484	0.0127084	0.00708538	0.00552622	0.00487702	0.0107602
		Flagellar P-ring protein FlgI	0.0269707	0.0106501	0.0054484	0.00953127	0.00664255	0.00200954	0	0.0053801
		Flagellum-specific ATP synthase FliI	0.0250713	0.0169149	0.0108968	0.0100608	0.00708538	0.00552622	0.00162567	0.00717347
		Flagellar motor rotation protein MotA	0.0246915	0.0206737	0.0217936	0.0132379	0.0106281	0.0110524	0	0.0143469
		Flagellar motor switch protein FliG	0.0246915	0.0187943	0.0108968	0.00953127	0.0048712	0.00502384	0.00162567	0.0107602
		Flagellar hook-length control protein FliK	0.023172	0.026312	0.027242	0.0375956	0.0504834	0.0467217	0.0227594	0.0125536
		Flagellar M-ring protein FliF	0.0227921	0.0137825	0.0054484	0.0068837	0.00354269	0.000502384	0	0.0053801
		RNA polymerase sigma factor for flagellar operon	0.0227921	0.014409	0.0054484	0.0116493	0.00885673	0.00602861	0.00325135	0.00358674
		Flagellin protein FlaB	0.0220324	0.013156	0.0054484	0.00847224	0.00531404	0.00452145	0	0.00179337
		Flagellar basal-body rod protein FlgC	0.0216525	0.0137825	0.0054484	0.00953127	0.00575687	0.00401907	0	0.00358674
		Flagellar biosynthesis protein FliP	0.0208928	0.0162884	0.0054484	0.0100608	0.00708538	0.00401907	0.00487702	0.00717347
		Flagellar L-ring protein FlgH	0.0205129	0.00877067	0	0.00529515	0.00177135	0.00100477	0.00162567	0.0053801
		Flagellar basal-body rod protein FlgB	0.0197532	0.011903	0	0.00847224	0.00398553	0.00351669	0	0.00717347
		Flagellar biosynthesis protein FliQ	0.0189934	0.0162884	0.0054484	0.00794273	0.00398553	0.00251192	0.00325135	0.00717347
		Flagellar biosynthesis protein FliR	0.0189934	0.0162884	0.0054484	0.0068837	0.00265702	0.00351669	0.00162567	0.00717347
		Flagellar synthesis regulator FleN	0.0189934	0.014409	0.0054484	0.0068837	0.0048712	0.0030143	0	0.0053801
		Flagellar basal-body rod modification protein FlgD	0.0186136	0.0137825	0	0.00476564	0.00177135	0.00200954	0.00162567	0.0053801
		Flagellar motor switch protein FliM	0.0186136	0.0162884	0.0054484	0.0068837	0.00664255	0.00452145	0.00325135	0.00896684
		Flagellar motor switch protein FliN	0.0182337	0.0187943	0.0217936	0.0111198	0.00797106	0.00803814	0.00162567	0.00896684
		Flagellar hook-basal body complex protein FliE	0.0178538	0.011903	0.0054484	0.00900176	0.00752822	0.00653099	0	0.00896684
		Flagellar protein FlgJ	0.0170941	0.00563829	0.0054484	0.00900176	0.00531404	0.00200954	0	0.0053801
		MotA/TolQ/ExbB proton channel family protein, probably associated with flagella	0.0140551	0.00939714	0.0054484	0.00635418	0.00398553	0.00251192	0.00487702	0.0053801
		Flagellar protein FlgP	0.0136753	0.00626476	0	0.00370661	0	0	0.00162567	0
		Flagellar basal-body rod protein FlgF	0.0125357	0.00877067	0	0.00423612	0.00177135	0.00200954	0.00162567	0.0125536
		Flagellar biosynthesis protein FliS	0.00987658	0.00689124	0	0.00476564	0.00309986	0.00100477	0	0.00358674
		Flagellar biosynthesis protein FliL	0.00797724	0.00689124	0	0.00317709	0.000442836	0.00150715	0.00162567	0.00717347
		Chemotaxis protein	Med-Oct-2015-15m	Med-OCT2015-30m	Med-OCT2015-45m	Med-OCT2015-60m	Med-OCT2015-75m	Med-OCT2015-90m	MedWinter-JAN2015-20m	MedWinter-JAN2015-80m
		Chemotaxis protein methyltransferase CheR	0.00797724	0.00626476	0	0.00529515	0.00442836	0.0030143	0.00487702	0.0322806
		Chemotaxis response regulator protein-glutamate methylesterase CheB	0.00417855	0.00751771	0.0054484	0.00423612	0.00664255	0.00803814	0.00325135	0.0143469
		Methyl-accepting chemotaxis protein I	0.00417855	0.0025059	0	0.00529515	0.00664255	0.00904291	0.00162567	0.087875
		Chemotaxis regulator transmits chemoreceptor signals to flagelllar motor components CheY	0.00379868	0.00438533	0.0054484	0.0068837	0.00354269	0.00753576	0.00325135	0.0215204
		Signal transduction histidine kinase CheA	0.00379868	0.00501181	0.0054484	0.00476564	0.00797106	0.00653099	0.00162567	0.019727
		Aerotaxis sensor receptor protein	0.00113961	0.000626476	0	0	0	0	0.00162567	0.0215204
		Chemotaxis protein CheV	0.00113961	0.000626476	0	0.000529515	0.000442836	0.000502384	0.00162567	0.0179337
		Predicted signal transduction protein	0.000759737	0	0	0.00158855	0	0	0	0.0125536
